# Supplementary material for: T cell responses against SARS-CoV-2 and its Omicron variant in a patient with B cell lymphoma after multiple doses of a COVID-19 mRNA vaccine
Source: PubMed Central journal article supplement — J Immunother Cancer. 2022 Jul 14;10(7):e004953. doi: 10.1136/jitc-2022-004953 (PMC9295666; doi:10.1136/jitc-2022-004953), 2022-07-14
Supplement: jitc-2022-004953supp001.pdf [file jitc-2022-004953supp001.pdf]

## Supplemental Figure 1

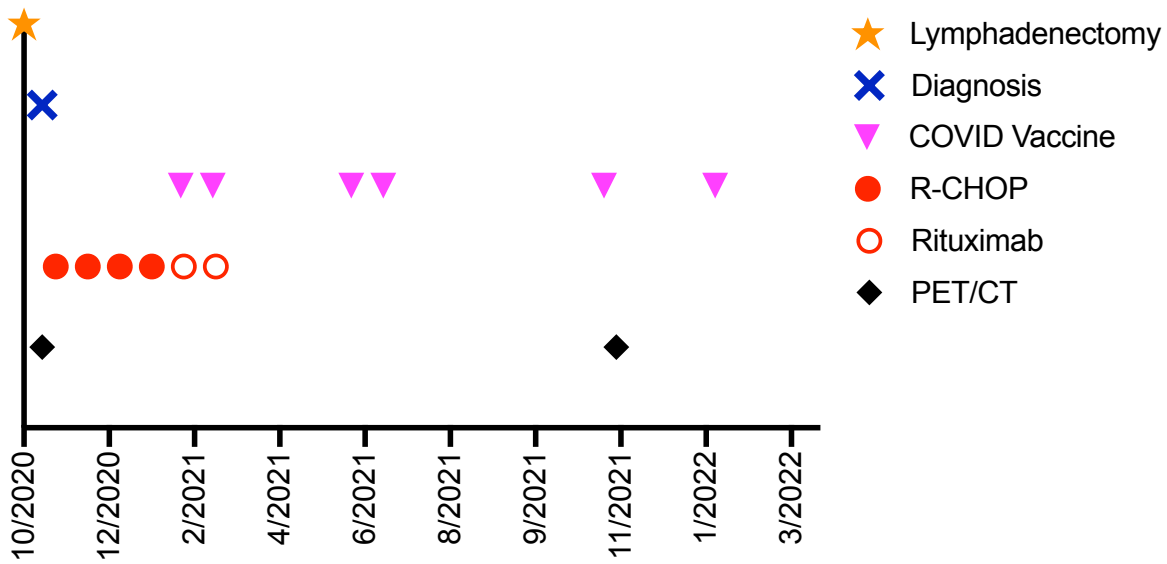

**Supplemental Figure 1: Time course of clinical events and treatments**

## Supplemental Figure 2

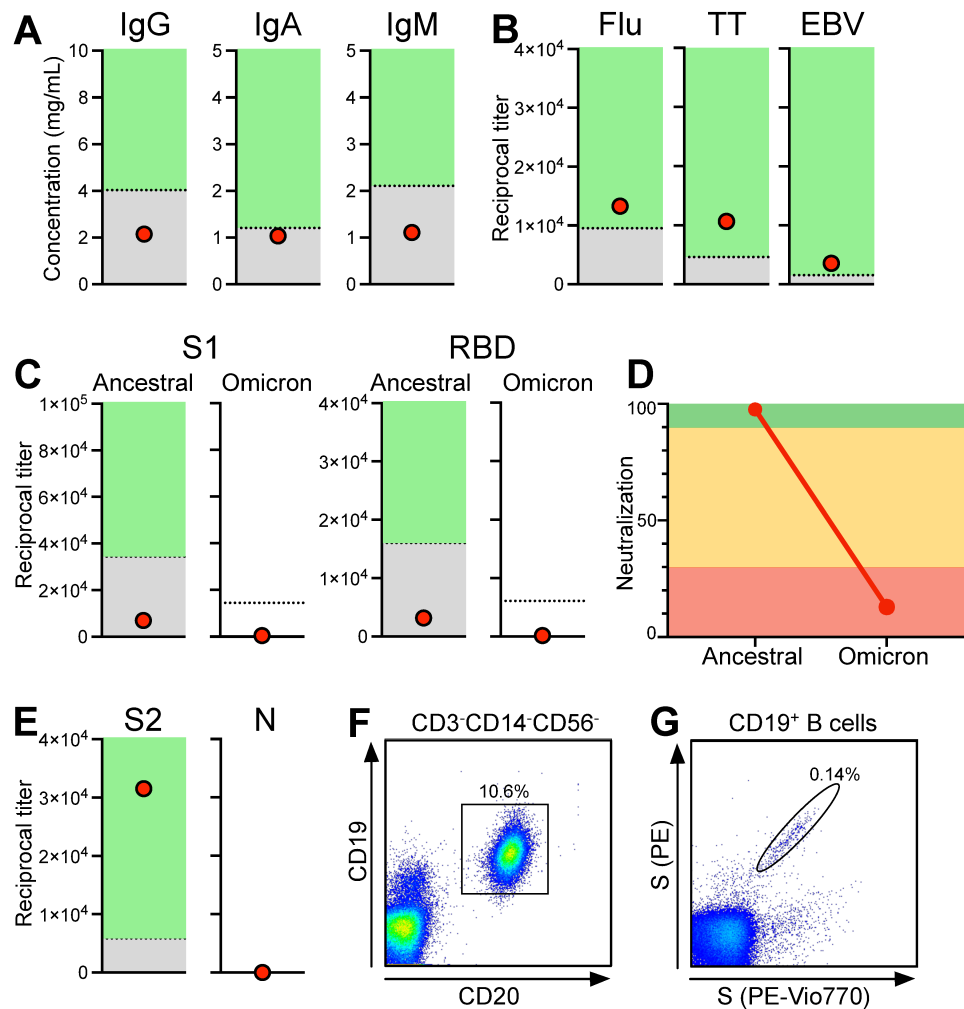

### Supplemental Figure 2: B cell responses in a patient with B cell lymphoma after multiple rounds of a COVID-19 mRNA vaccine

(A) Absolute levels of IgG, IgA, and IgM antibodies in our patient (red dot) were measured after 5 doses of the COVID-19 mRNA vaccine using a commercially available ELISA. Concentrations are shown in mg/mL and in relation to those of 7 healthy controls at 4 weeks after the second dose of a COVID-19 mRNA vaccine. (B) Titers of IgG antibodies against full-length recombinant Influenza A nucleoprotein (Flu), tetanus toxoid (TT), and Epstein-Barr virus (EBV) were measured in an ELISA. (C) IgG antibody titers against SARS-CoV-2 proteins S1 and RBD and their Omicron variants. (D) Neutralizing activity in the peripheral blood of our B cell lymphoma patient. Green, orange, and red areas indicate different degrees of inhibition (green: >90%, orange: 30-89%, red: <30%). Neutralizing activity is shown for both the original "ancestral" SARS-CoV-2 RBD protein (left) and for its Omicron variant (right). (E) The patient's IgG antibody titers against SARS-CoV-2 proteins S2 and N. (F) Flow cytometric analysis of B cell subpopulations in the peripheral blood of our B cell lymphoma patient after 5 doses of the vaccine. Dot plots show CD19<sup>+</sup>/CD20<sup>+</sup> B cells after gating on CD3<sup>+</sup>/CD56<sup>-</sup>/CD14<sup>-</sup> lymphocytes. (G) Anti-S antibody-secreting B cells in the B cell lymphoma patient.

## Supplemental Figure 3

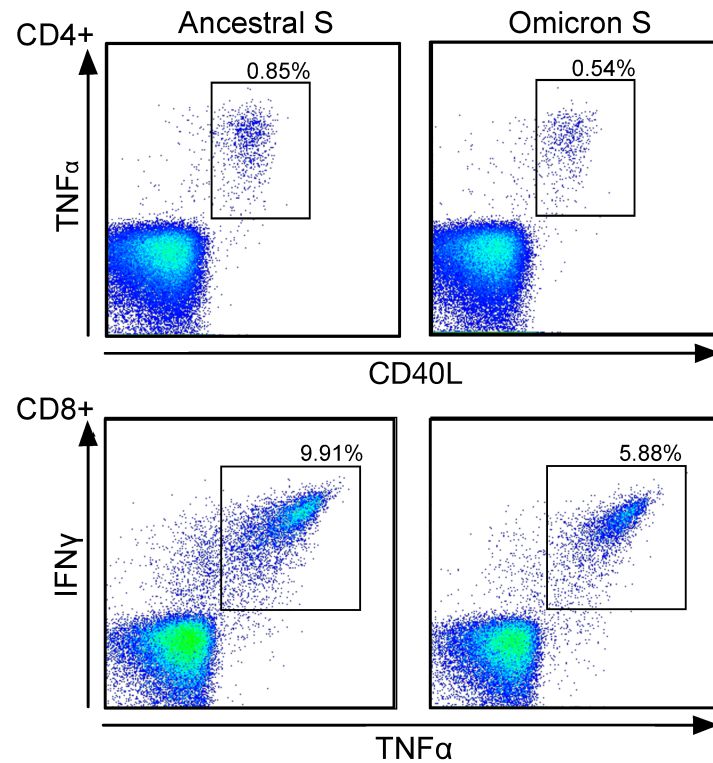

**Supplemental Figure 3: Recognition of ancestral vs. Omicron SARS-CoV-2 S protein by vaccine-induced T cells**

The dot plots on the left show our patient's vaccine-induced antiviral CD4<sup>+</sup> (upper panel) and CD8<sup>+</sup> T cells (lower panel) recognizing peptide pools covering the complete sequence of ancestral vs. Omicron SARS-CoV-2 S protein. Numbers indicate percentages of S protein-specific T cells out of all CD4<sup>+</sup> and CD8<sup>+</sup> T cells, respectively.
