# Supplementary material for: T cell responses against SARS-CoV-2 and its Omicron variant in a patient with B cell lymphoma after multiple doses of a COVID-19 mRNA vaccine
Source: PubMed Central journal article supplement — J Immunother Cancer. 2022 Jul 14;10(7):e004953. doi: 10.1136/jitc-2022-004953 (PMC9295666; doi:10.1136/jitc-2022-004953), 2022-07-14
Supplement: jitc-2022-004953supp003.pdf [file jitc-2022-004953supp003.pdf]

**Supplemental Table 1: Control Proteins**

| <b>Protein</b>                              | <b>Expression System</b> | <b>Manufacturer</b> | <b>Catalogue No.</b> |
|---------------------------------------------|--------------------------|---------------------|----------------------|
| Influenza A H1N1 Nucleoprotein (NP)         | Baculovirus-Insect Cell  | Sino Biological     | 11675-V08B           |
| Epstein-Barr Virus (EBV) Glycoprotein gp350 | Baculovirus-Insect Cell  | Sino Biological     | 40373-V08B           |
| Glutathione S-Transferase Alpha 1 (GSTA1)   | HEK293                   | Sino Biological     | 15237-H08H           |
| Tetanus Toxoid                              |                          | Calbiochem          | 582231               |

**Supplemental Table 2: SARS-CoV-2 Proteins**

| Protein                             | Variant             | Mutations                                                                                                                                                                                                            | Expression System | Conjugate | Manufacturer    | Catalogue No. |
|-------------------------------------|---------------------|----------------------------------------------------------------------------------------------------------------------------------------------------------------------------------------------------------------------|-------------------|-----------|-----------------|---------------|
| Spike S1                            |                     |                                                                                                                                                                                                                      | HEK293            |           | Acro Biosystems | S1N-C52H2     |
| Spike Receptor-Binding Domain (RBD) |                     |                                                                                                                                                                                                                      | HEK293            |           | Acro Biosystems | SPD-C52H2     |
| Spike S2                            |                     |                                                                                                                                                                                                                      | HEK293            |           | Acro Biosystems | S2N-C52H5     |
| Nucleocapsid (N)                    |                     |                                                                                                                                                                                                                      | HEK293            |           | Acro Biosystems | NUN-C5221     |
| Spike S1                            | Omicron (B.1.1.529) | A67V, HV69-70del, T95I, G142D, VYY143-145del, N211del, L212I, ins214EPE, G339D, S371L, S373P, S375F, K417N, N440K, G446S, S477N, T478K, E484A, Q493R, G496S, Q498R, N501Y, Y505H, T547K, D614G, H655Y, N679K, P681H) | HEK293            |           | Acro Biosystems | S1N-C52Ha     |
| Spike Receptor-Binding Domain (RBD) | Omicron (B.1.1.529) | G339D, S371L, S373P, S375F, K417N, N440K, G446S, S477N, T478K, E484A, Q493R, G496S, Q498R, N501Y, Y505H                                                                                                              | HEK293            |           | Acro Biosystems | SPD-C522e     |
| Receptor-Binding Domain (RBD)       | Omicron (B.1.1.529) | G339D, S371L, S373P, S375F, K417N, N440K, G446S, S477N, T478K, E484A, Q493R, G496S, Q498R, N501Y, Y505H                                                                                                              | HEK293            | HRP       | GenScript       | Z03730        |

**Supplemental Table 3: Monoclonal Antibodies for Flow Cytometry**

| Specificity | Conjugate             | Clone        | Isotype                | Manufacturer    | Test                           |
|-------------|-----------------------|--------------|------------------------|-----------------|--------------------------------|
| CD19        | APC-Vio 770           | LT19,        | Mouse IgG1k            | Miltenyi Biotec | Spike B Cell Analysis Kit      |
| CD27        | Vio Bright FITC (     | M-T271       | Mouse IgG1k            | Miltenyi Biotec |                                |
| IgG         | VioBlue®              | IS11-3B2.2.3 | Mouse IgG1k            | Miltenyi Biotec |                                |
| IgA         | VioGreen™             | IS11-8E10    | Mouse IgG1k            | Miltenyi Biotec |                                |
| IgM         | APC                   | PJ2-22H3     | Mouse IgG1             | Miltenyi Biotec |                                |
| CD3         | APC                   | REA613       | Recombinant human IgG1 | Miltenyi Biotec | SARS-CoV-2 T Cell Analysis Kit |
| CD4         | Vio® Bright B515      | REA623       | Recombinant human IgG1 | Miltenyi Biotec |                                |
| CD8         | VioGreen™             | REA734       | Recombinant human IgG1 | Miltenyi Biotec |                                |
| IFN-γ       | PE                    | REA600       | Recombinant human IgG1 | Miltenyi Biotec |                                |
| TNF-α       | PE-Vio® 770           | REA656       | Recombinant human IgG1 | Miltenyi Biotec |                                |
| CD14        | VioBlue®              | REA599       | Recombinant human IgG1 | Miltenyi Biotec |                                |
| CD20        | VioBlue®              | REA780       | Recombinant human IgG1 | Miltenyi Biotec |                                |
| CD154       | APC/Vio® 770          | REA238       | Recombinant human IgG1 | Miltenyi Biotec | Phenotypic B Cell Analysis     |
| CD19        | Pacific Blue®         | LT19         | Mouse IgG1             | Bio-Rad         |                                |
| CD20        | Brilliant Violet 510™ | 2H7          | Mouse IgG2b            | BioLegend       |                                |
| CD24        | PE                    | ML5          | Mouse IgG2ak           | BioLegend       |                                |
| CD27        | Alexa Fluor 700       | LT27         | Mouse IgG2a            | Bio-Rad         |                                |
| CD38        | APC/Fire™ 750         | HB-7         | Mouse IgG1k            | BioLegend       |                                |
| IgD         | FITC                  | Polyclonal   | Goat IgG               | Bio-Rad         |                                |
| CD3         | Alexa Fluor® 700      | OKT3         | Mouse IgG2ak           | Bio-Legend      |                                |
| CD14        | Alexa Fluor® 700      | TÜK4         | Mouse IgG2ak           | Bio-Rad         |                                |
| CD56        | Alexa Fluor® 700      | 123C3        | Mouse IgG1             | Bio-Rad         |                                |
